# Supplementary material for: Selective conversion of CO2 to CH4 enhanced by WO3/In2O3 S-scheme heterojunction photocatalysts with efficient CO2 activation
Source: Royal Society of Chemistry journal article supplement (doi:10.1039/d3ta02951d), 2023-01-01
Supplement: d3ta02951d1.pdf [file d3ta02951d1.pdf]

## Supporting Information

### Selective Conversion of CO<sub>2</sub> to CH<sub>4</sub> Enhanced by WO<sub>3</sub>/In<sub>2</sub>O<sub>3</sub> S-scheme Heterojunction Photocatalyst with Efficient CO<sub>2</sub> Activation

*Ying He,<sup>a</sup> Zhengpeng Yang,<sup>a</sup> Jiaguo Yu,<sup>a</sup> Difa Xu,<sup>b</sup> Chengyuan Liu,<sup>c</sup> Yang Pan,<sup>c</sup> Wojciech Macyk,<sup>d</sup> and Feiyan Xu<sup>a,\*</sup>*

<sup>a</sup> Laboratory of Solar Fuel, Faculty of Materials Science and Chemistry, China University of Geosciences, 68 Jincheng Street, Wuhan 430078, P. R. China

<sup>b</sup> Hunan Key Laboratory of Applied Environmental Photocatalysis, Changsha University, Changsha, 410022, P. R. China

<sup>c</sup> National synchrotron radiation laboratory, University of science and technology of China, Hefei, 230026, P. R. China

<sup>d</sup> Faculty of Chemistry, Jagiellonian University, ul. Gronostajowa 2, Kraków 30–387, Poland

\* E-mail: [xufeyan@cug.edu.cn](mailto:xufeyan@cug.edu.cn)

## 1. Experimental section

### 1.1 Chemicals

Sodium tungstate dehydrate ( $\text{Na}_2\text{WO}_4 \cdot 2\text{H}_2\text{O}$ ) and tetrafluoroboric acid ( $\text{HBF}_4$ , 40 wt.%) were obtained from Shanghai Aladdin biochemical technology Co., Ltd. Indium nitrate ( $\text{In}(\text{NO}_3)_3 \cdot 4\text{H}_2\text{O}$ ) was purchased from Macklin Reagent Co., Ltd. All the chemicals were of analytical grade and used without further purification.

### 1.2 Characterizations

The X-Ray diffraction (XRD) patterns of as-obtained catalysts were recorded using a Shimadzu XRD-6100 X-ray diffractometer (Japan) with Cu  $K\alpha$  radiation. Field emission scanning electron microscope (FESEM) images were characterized *via* JSM 7500F. Transmission electron microscopy (TEM), high-resolution transmission electron microscopy (HRTEM) and the corresponding energy-dispersive X-ray spectroscopy (EDX) mapping were studied by Talos F200S. The light absorption spectra of the prepared samples were obtained using a Shimadzu UV-2600 UV-visible spectrophotometer (Japan). The surface electronic states of the samples were determined by X-ray photoelectron spectroscopy (XPS) *via* a Thermo Scientific ESCALA 210 XPS spectrometer system (USA) with 300 W Al  $K\alpha$  radiation. *In-situ* XPS measurements were performed under the same condition, except for the introduction of light irradiation. The binding energies were referenced to the C 1s peak at 284.8 eV from adventitious carbon. The contact potential difference (CPD) was recorded on a kelvin probe apparatus (Instytut Fotonowy, Poland).

And the work function of the probe is calibrated to be 4.25 eV by the gold tip as a standard reference surface. The carbon dioxide temperature-programmed desorption (CO<sub>2</sub>-TPD) test was investigated on an BELCAT II (Microtrac MRB).

*In-situ* diffuse reflectance infrared Fourier transform spectroscopy (DRIFTS) were acquired on the Nicolet iS50 spectrometer (Thermo Scientific, USA). Time-resolved photoluminescence (TRPL) spectra were collected on a fluorescence lifetime spectrophotometer (FLS 1000, Edinburgh, UK) with an excitation wavelength of 375 nm.

The average lifetime ( $\tau_a$ ) can be calculated according to the following equation:

$$\tau_a = \frac{A_1\tau_1^2 + A_2\tau_2^2 + A_3\tau_3^2}{A_1\tau_1 + A_2\tau_2 + A_3\tau_3} \quad (1)$$

where  $\tau_1$  represents the lifetime of radiative recombination process,  $\tau_2$  and  $\tau_3$  stand for the lifetime of non-radiative recombination and energy transfer process, respectively.  $A_1$ ,  $A_2$  and  $A_3$  are the preexponential factors of decay curves.

Electrochemical measurements were conducted using a standard three-electrode system on an electrochemical workstation (CHI660C, China) in 50 mL of electrolyte containing 0.5 M Na<sub>2</sub>SO<sub>4</sub>. Pt wire (1.0 cm<sup>2</sup>) and Ag/AgCl (filled with saturated KCl) were worked as the counter and reference electrodes, respectively. For the working electrode, a slurry was prepared by dispersing 20 mg of catalyst in 1.0 mL of ethanol and 10  $\mu$ L of Nafion solution to make slurry, and then coated onto the conductive surface of FTO glasses with an active area of about 1.0 cm<sup>2</sup>. The electrode was finally dried in an oven at 60 °C for 1 h.

### ***1.3 Photocatalytic CO<sub>2</sub> reduction***

The photocatalytic CO<sub>2</sub> reduction was carried out in an online gas-closed system equipped with a gas-circulated pump (OLPCRS-2, Shanghai Boyi Scientific Instrument Co., Ltd.). Typically, 50 mg of photocatalysts and 1 mL of H<sub>2</sub>O were added in a Quartz and Pyrex glass hybrid reactor connecting to the CO<sub>2</sub> photoreduction system. The air-tight system was completely evacuated by using a vacuum pump, after which about 70 kPa of high-purity CO<sub>2</sub> (99.999%) gas was injected. Once achieving adsorption equilibrium, a 300 W Xe arc lamp with a 420 nm cut-off filter (Microsolar 300 Xenon lamp source, Beijing Perfectlight, China) was used as the light source. The photocatalytic CO<sub>2</sub> reduction products were analyzed using a gas chromatograph (GC-2030, Shimadzu Corp., Japan) equipped with barrier discharge ionization detector (BID) and a capillary column (Carboxen 1010 PLOT Capillary, 60 m × 0.53 mm). The apparent quantum efficiency (AQE) of the products over WI10 was calculated as follows:

$$\begin{aligned}
 \text{AQE}(\%) &= \frac{\text{number of reacted electrons}}{\text{number of incident photons}} \times 100 \\
 &= \frac{\text{number of CO molecules} \times 2 + \text{number of CH}_4 \text{ molecules} \times 8}{\text{number of incident photons}} \times 100 \\
 &= \frac{(2 \times R_{\text{CO}} + 8 \times R_{\text{CH}_4}) \times t_1 \times N_A}{P \times t_2 \times \frac{\lambda}{hc}} \times 100
 \end{aligned} \tag{2}$$

where  $R_{\text{CO}}$  and  $R_{\text{CH}_4}$  are the CO and CH<sub>4</sub> production rate (mol h<sup>-1</sup>);  $t_1$  is the irradiation time (1 h);  $N_A$  is Avogadro constant ( $6.02 \times 10^{23}$  mol<sup>-1</sup>);  $P$  is the total incident light flux (W, J s<sup>-1</sup>) and equals light intensity per unit area ( $E$ , W cm<sup>-2</sup>) times effective irradiation area ( $S$ , cm<sup>2</sup>), where  $E$  can be measured by the radiant power energy meter (UV-A and FZ-A, Photoelectric Instrument Factory of Beijing Normal University),  $S$  is 4.5 cm<sup>2</sup> in this

experiment;  $t_2$  equals 3600 s;  $\lambda$  is the monochromatic light wavelength(m);  $h$  is the Planck constant ( $6.626 \times 10^{-34}$  J s) and  $c$  is the light speed in vacuum ( $3 \times 10^8$  m s<sup>-1</sup>).

Moreover, the selectivity of products was calculated by the following equation:

$$\text{selectivity of product } C_i(\%) = \frac{\text{yield rate of } C_i (\mu\text{mol h}^{-1})}{\text{total yield rates of all products}} \times 100 \quad (3)$$

where  $C_i$  represents the reduction products including CO and CH<sub>4</sub>.

Synchrotron-radiation vacuum ultraviolet photoionization mass spectrometry (SVUV-PIMS) was carried out at the combustion endstation of the BL03U beamline at the National Synchrotron Radiation Laboratory.

#### ***1.4 Computational details***

The periodic DFT calculations were performed by using Vienna Ab-initio Simulation Package (VASP).<sup>1</sup> The exchange correlation between electrons was treated using the generalized gradient approximation (GGA) in the Perdew–Burke–Ernzerhof (PBE) form.<sup>2-3</sup> A (1×1) supercell of In<sub>2</sub>O<sub>3</sub> (111) and a (2×2) supercell of WO<sub>3</sub> (001) surface slabs were adopted, where the half bottom atomic layers were fixed for all calculations. To avoid interactions between periodic structures, ~20 Å vacuum space was inserted. The cutoff energy was chosen at 520 eV, and the Brillouin zone was sampled using  $k$ -point spacing of 0.02 Å<sup>-1</sup>.<sup>4-6</sup> The convergence thresholds for energy and atomic forces were set as 10<sup>-5</sup> eV and 0.02 eV Å<sup>-1</sup>, respectively. The van der Waals interaction between adsorbate and slab was corrected with the DFT-D3(BJ) method.<sup>7-8</sup>

The free energy ( $G$ ) for each isolated or adsorbed molecule was calculated at 298.15 K with zero-point energy (ZPE) correction. The formula is  $G = E + \text{ZPE} - TS$ , where  $E$  is the electronic energy calculated with VASP, ZPE is the zero-point energy and  $TS$  is the entropy contribution. The work function ( $\Phi$ ) of  $\text{In}_2\text{O}_3$  (111) and  $\text{WO}_3$  (001) slabs were calculated according to the formula of  $\Phi = E_V - E_F$ , where  $E_V$  and  $E_F$  stand for the vacuum energy level and Fermi level of the slabs, respectively.

## 2. Supporting Figures

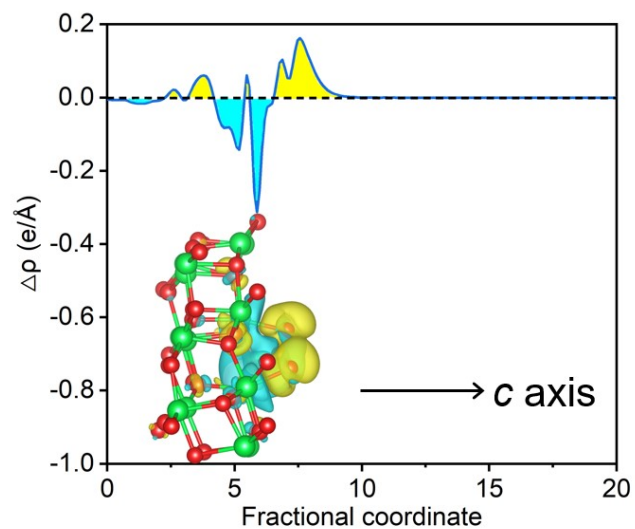

**Fig. S1** Planar-averaged electron density difference  $\Delta\rho$  of  $\text{CO}_2$  absorbed on  $\text{In}_2\text{O}_3$ . Cyan and yellow areas indicate electron depletion and accumulation, respectively.

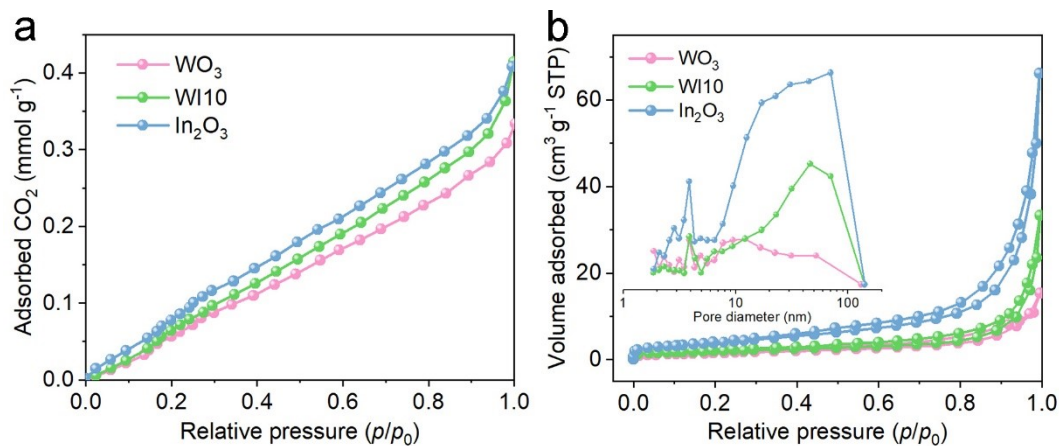

**Fig. S2** (a) CO<sub>2</sub> adsorption isotherms, (b) nitrogen adsorption-desorption isotherms and the corresponding pore size distribution (inset) of WO<sub>3</sub>, WI10 and In<sub>2</sub>O<sub>3</sub>. WI10 represents the WO<sub>3</sub>/In<sub>2</sub>O<sub>3</sub> heterojunctions, where W and I represent WO<sub>3</sub> and In<sub>2</sub>O<sub>3</sub>, respectively; *10* is the molar ratios of In<sub>2</sub>O<sub>3</sub> in WO<sub>3</sub>/In<sub>2</sub>O<sub>3</sub> composites.



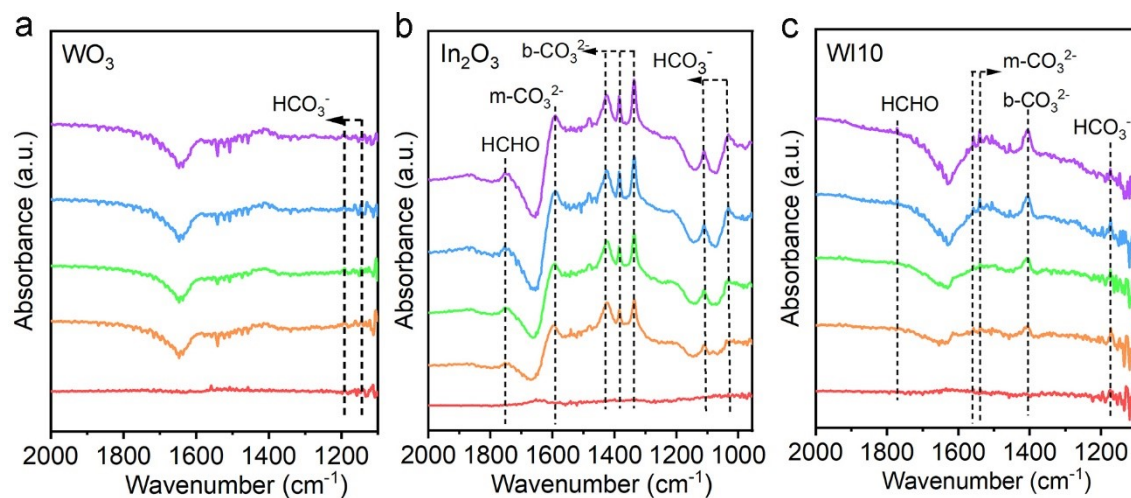

**Fig. S3** *In-situ* DRIFT spectra of (a)  $\text{WO}_3$ , (b)  $\text{In}_2\text{O}_3$  and (c) WI10 after adsorption of  $\text{CO}_2$  for 15, 30, 45 and 60 min in dark. WI10 represents the  $\text{WO}_3/\text{In}_2\text{O}_3$  heterojunctions, where W and I represent  $\text{WO}_3$  and  $\text{In}_2\text{O}_3$ , respectively; 10 is the molar ratios of  $\text{In}_2\text{O}_3$  in  $\text{WO}_3/\text{In}_2\text{O}_3$  composites.

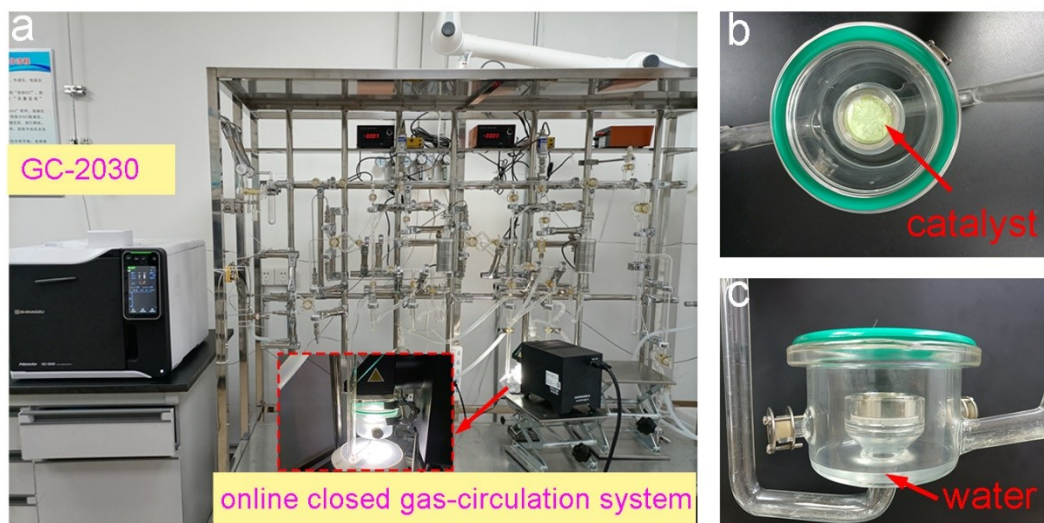

**Fig. S4** (a) The online closed gas-circulation system and (b) the quartz reactor for photocatalytic CO<sub>2</sub> reduction.

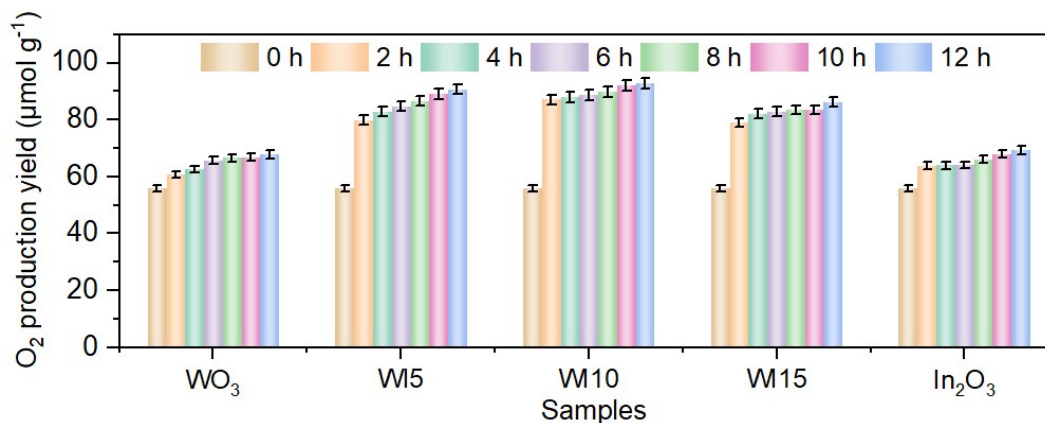

**Fig. S5** O<sub>2</sub> production yield over WO<sub>3</sub>, W1x, and In<sub>2</sub>O<sub>3</sub> during 12-h experiment performed under visible light irradiation. The initial O<sub>2</sub> comes from the input high-purity CO<sub>2</sub> (99.999%), and its concentrations were normalized. W1x represents the WO<sub>3</sub>/In<sub>2</sub>O<sub>3</sub> heterojunctions, where W and I represent WO<sub>3</sub> and In<sub>2</sub>O<sub>3</sub>, respectively; x is the molar ratios of In<sub>2</sub>O<sub>3</sub> in WO<sub>3</sub>/In<sub>2</sub>O<sub>3</sub> composites.

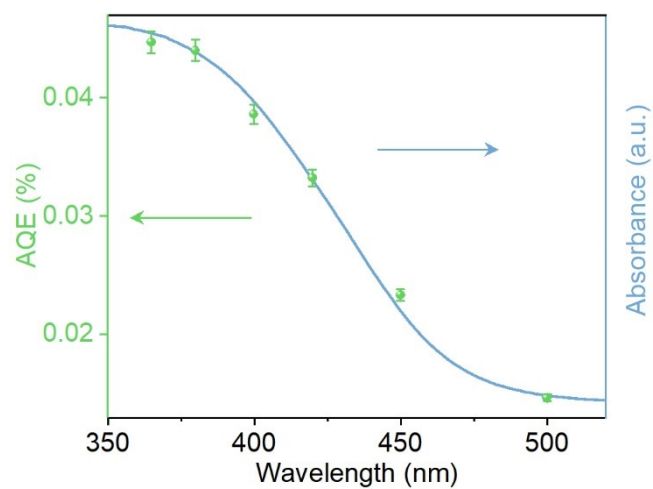

**Fig. S6** Wavelength-dependent AQE and the UV-vis absorption spectrum of WI10 sample.

WI10 represents the  $\text{WO}_3/\text{In}_2\text{O}_3$  heterojunctions, where W and I represent  $\text{WO}_3$  and  $\text{In}_2\text{O}_3$ , respectively; 10 is the molar ratios of  $\text{In}_2\text{O}_3$  in  $\text{WO}_3/\text{In}_2\text{O}_3$  composites.

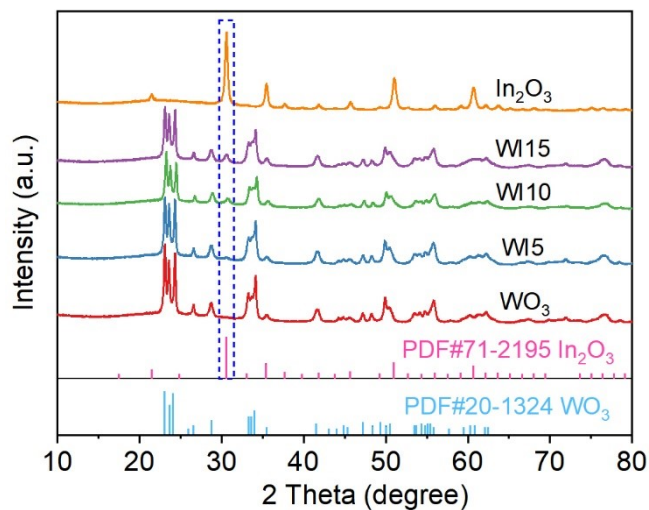

**Fig. S7** XRD patterns of  $\text{WO}_3$ ,  $\text{In}_2\text{O}_3$  and  $\text{WI}_x$ .  $\text{WI}_x$  represents the  $\text{WO}_3/\text{In}_2\text{O}_3$  heterojunctions, where W and I represent  $\text{WO}_3$  and  $\text{In}_2\text{O}_3$ , respectively;  $x$  is the molar ratios of  $\text{In}_2\text{O}_3$  in  $\text{WO}_3/\text{In}_2\text{O}_3$  composites.

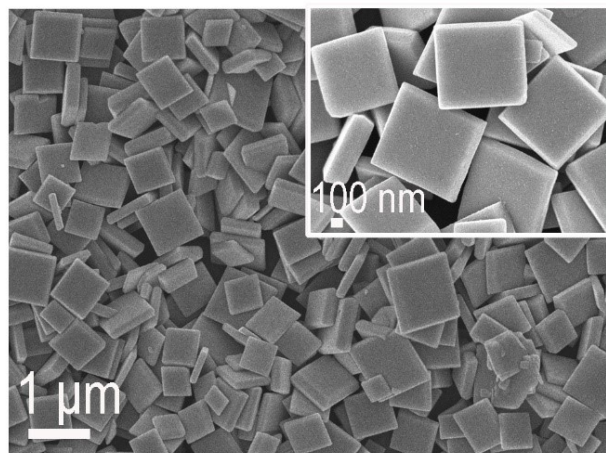

**Fig. S8** FESEM image of precursor  $\text{WO}_3 \cdot \text{H}_2\text{O}$ .

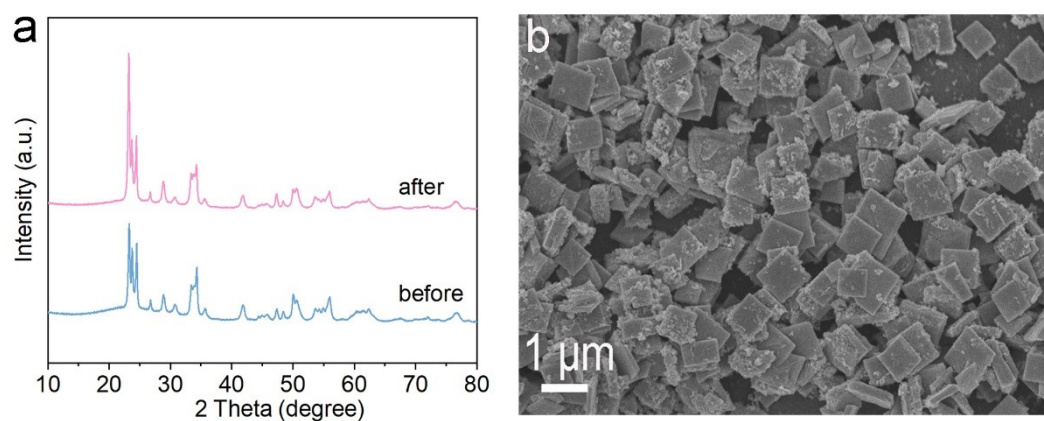

**Fig. S9** (a) XRD pattern and (b) FESEM image of WI10 after photocatalytic reactions.

WI10 represents the WO<sub>3</sub>/In<sub>2</sub>O<sub>3</sub> heterojunctions, where W and I represent WO<sub>3</sub> and In<sub>2</sub>O<sub>3</sub>, respectively; 10 is the molar ratios of In<sub>2</sub>O<sub>3</sub> in WO<sub>3</sub>/In<sub>2</sub>O<sub>3</sub> composites.

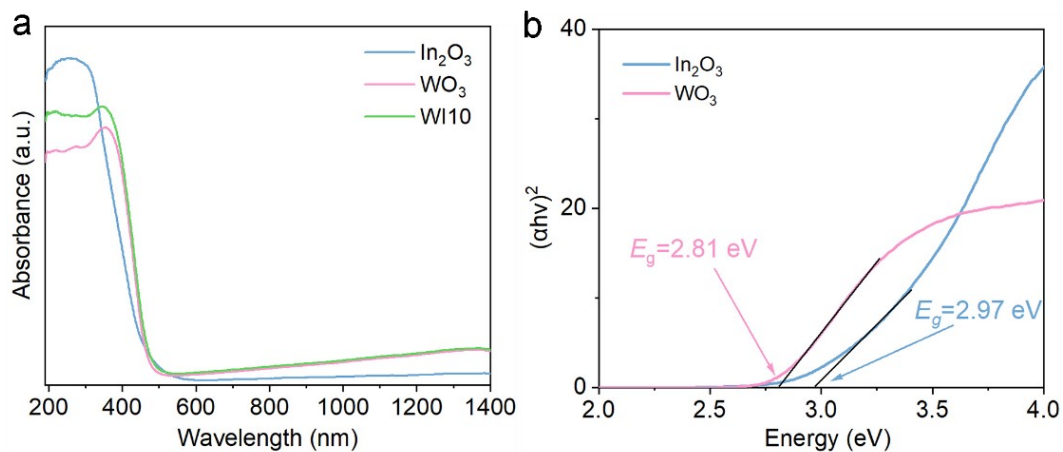

**Fig. S10** (a) UV-vis spectra of  $\text{WO}_3$ ,  $\text{In}_2\text{O}_3$  and  $\text{WI10}$ , (b) Kubelka-Munk plots of  $\text{WO}_3$  and  $\text{In}_2\text{O}_3$ .  $\text{WI10}$  represents the  $\text{WO}_3/\text{In}_2\text{O}_3$  heterojunctions, where W and I represent  $\text{WO}_3$  and  $\text{In}_2\text{O}_3$ , respectively; 10 indicates the molar ratios of  $\text{In}_2\text{O}_3$  in  $\text{WO}_3/\text{In}_2\text{O}_3$  composites.



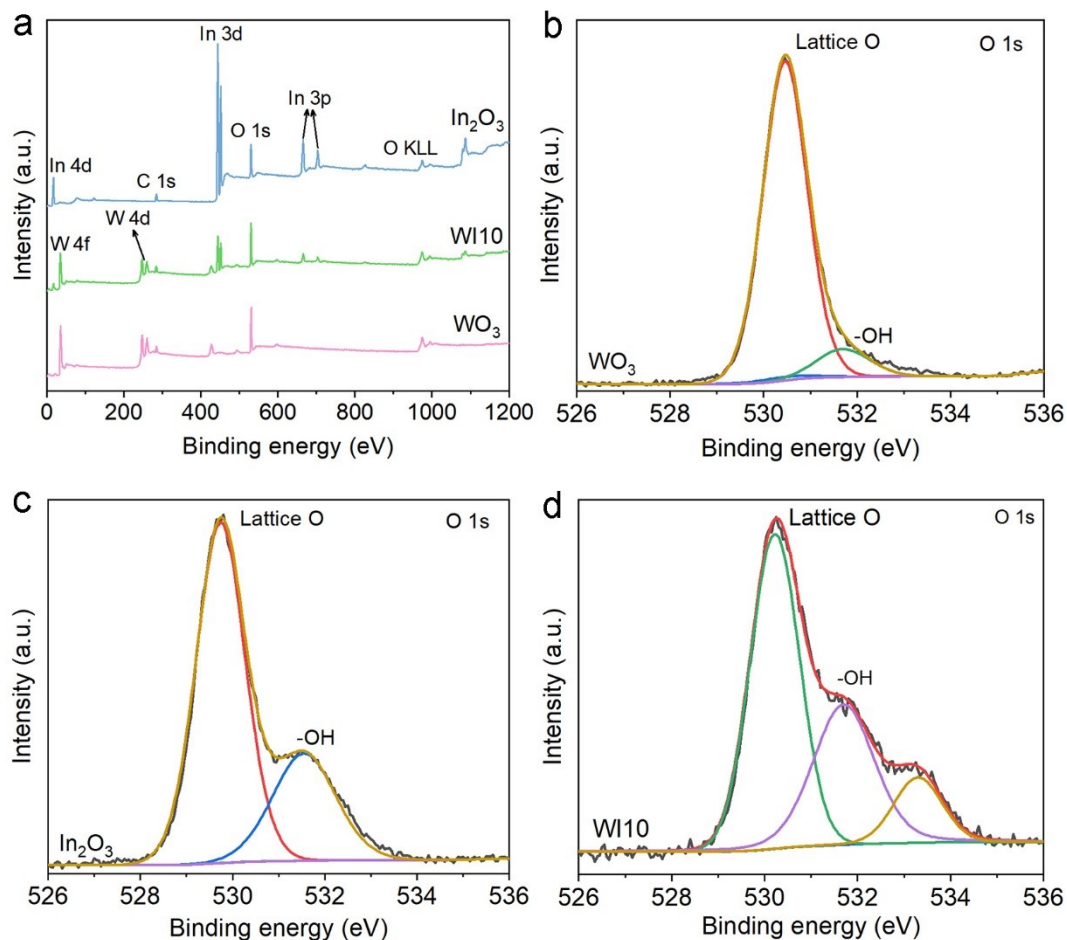

**Fig. S11** (a) XPS survey spectra, XPS spectra of  $\text{O } 1s$  of (b)  $\text{WO}_3$ , (c)  $\text{In}_2\text{O}_3$ , and (d)  $\text{WI10}$ .

$\text{WI10}$  represents the  $\text{WO}_3/\text{In}_2\text{O}_3$  heterojunctions, where W and I represent  $\text{WO}_3$  and  $\text{In}_2\text{O}_3$ , respectively; 10 indicates the molar ratios of  $\text{In}_2\text{O}_3$  in  $\text{WO}_3/\text{In}_2\text{O}_3$  composites.

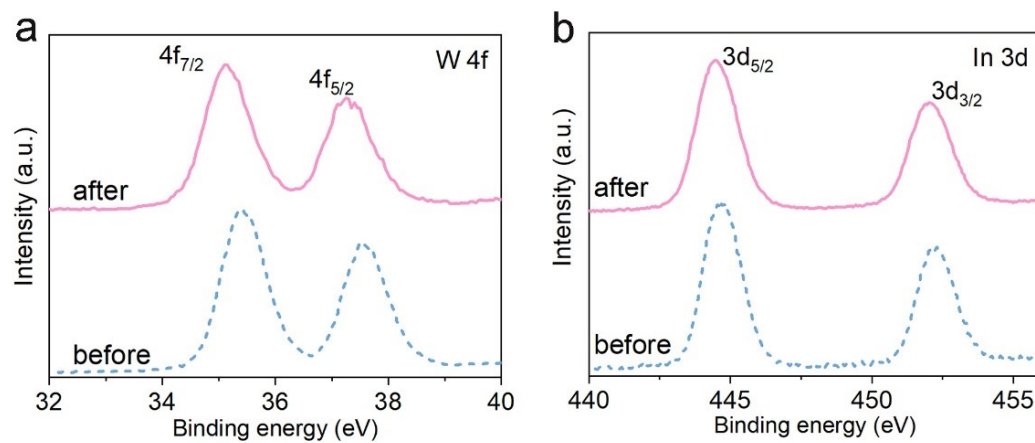

**Fig. S12** XPS spectra of (a) W 4f and (b) In 3d of WI10 before and after photocatalytic reactions. WI10 represents the  $\text{WO}_3/\text{In}_2\text{O}_3$  heterojunctions, where W and I represent  $\text{WO}_3$  and  $\text{In}_2\text{O}_3$ , respectively; 10 is the molar ratios of  $\text{In}_2\text{O}_3$  in  $\text{WO}_3/\text{In}_2\text{O}_3$  composites.

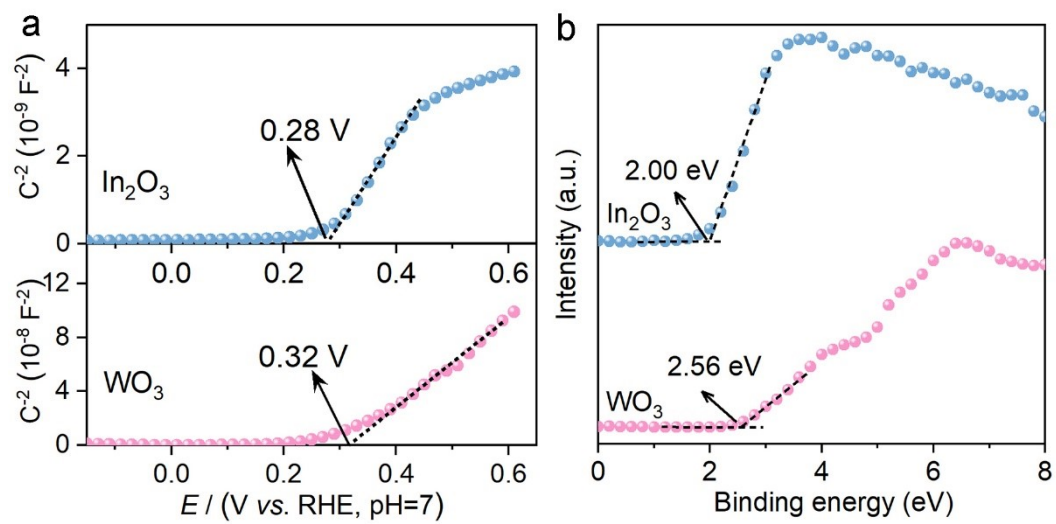

**Fig. S13** (a) Mott–Schottky plots and (b) valence band XPS spectra of  $\text{WO}_3$  and  $\text{In}_2\text{O}_3$ .

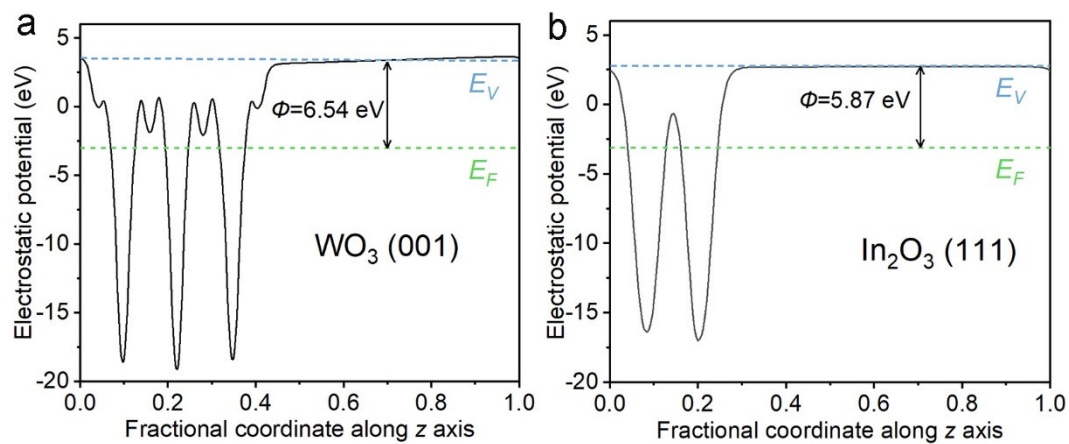

**Fig. S14** Calculated electrostatic potentials of (a)  $\text{WO}_3$  (001) and (b)  $\text{In}_2\text{O}_3$  (111) slabs.

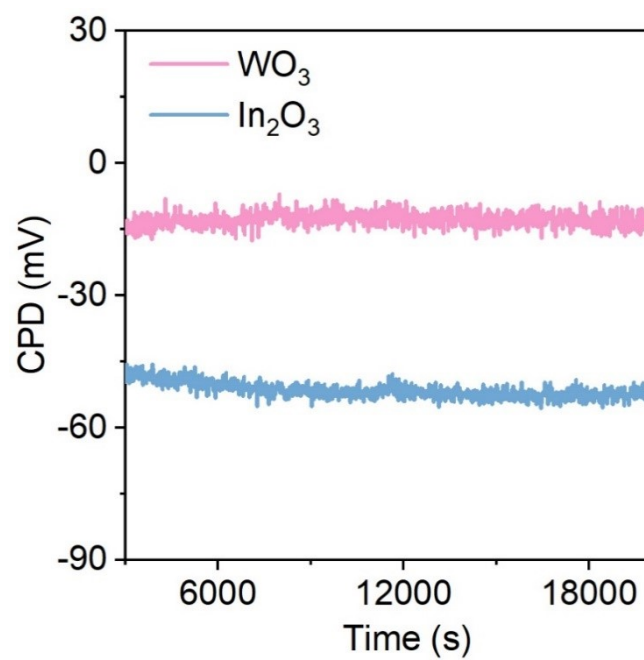

**Fig. S15** CPD profile of  $\text{WO}_3$  and  $\text{In}_2\text{O}_3$  in the dark.

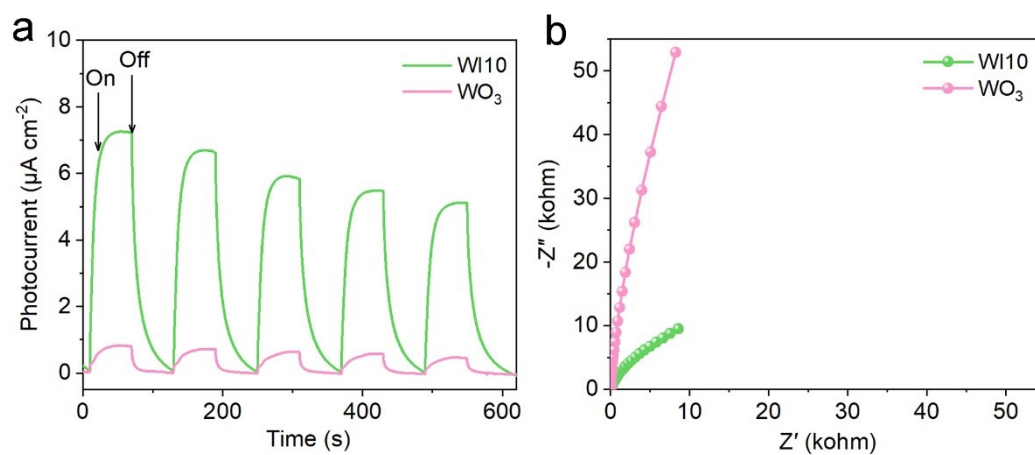

**Fig. S16** (a) Transient photocurrent response and (b) Nyquist plots of WO<sub>3</sub> and WI10.

WI10 represents the WO<sub>3</sub>/In<sub>2</sub>O<sub>3</sub> heterojunctions, where W and I represent WO<sub>3</sub> and In<sub>2</sub>O<sub>3</sub>, respectively; 10 indicates the molar ratios of In<sub>2</sub>O<sub>3</sub> in WO<sub>3</sub>/In<sub>2</sub>O<sub>3</sub> composites.

### 3. Supporting Tables

**Table S1.** Physical properties of  $\text{WO}_3$ , WI10 and  $\text{In}_2\text{O}_3$ . WI10 represents the  $\text{WO}_3/\text{In}_2\text{O}_3$  heterojunctions, where W and I represent  $\text{WO}_3$  and  $\text{In}_2\text{O}_3$ , respectively; 10 is the molar ratios of  $\text{In}_2\text{O}_3$  in  $\text{WO}_3/\text{In}_2\text{O}_3$  composites.

| Sample                  | $S_{\text{BET}}$ ( $\text{m}^2/\text{g}$ ) | $V_{\text{p}}$ ( $\text{cm}^3/\text{g}$ ) | $d_{\text{p}}$ (nm) |
|-------------------------|--------------------------------------------|-------------------------------------------|---------------------|
| $\text{WO}_3$           | 6                                          | 0                                         | 15.2                |
| WI10                    | 7                                          | 0.1                                       | 23.8                |
| $\text{In}_2\text{O}_3$ | 15                                         | 0.1                                       | 24.7                |

**Table S2.** The calculated AQE at different monochromatic wavelengths over the WI10 sample. WI10 represents the WO<sub>3</sub>/In<sub>2</sub>O<sub>3</sub> heterojunctions, where W and I represent WO<sub>3</sub> and In<sub>2</sub>O<sub>3</sub>, respectively; *I*0 is the molar ratios of In<sub>2</sub>O<sub>3</sub> in WO<sub>3</sub>/In<sub>2</sub>O<sub>3</sub> composites.

| $\lambda$ (nm)                 | 365    | 380    | 400    | 420    | 450    | 500    |
|--------------------------------|--------|--------|--------|--------|--------|--------|
| $E$ (mW/cm <sup>2</sup> )      | 14     | 15     | 17     | 14     | 20     | 12     |
| $M_{\text{CO}}$ (ppm)          | 7.71   | 3.56   | 4.21   | 3.72   | 3.47   | 0.00   |
| $R_{\text{CO}}$ (μmol/h)       | 0.0026 | 0.0012 | 0.0014 | 0.0013 | 0.0012 | 0.0000 |
| $M_{\text{CH}_4}$ (ppm)        | 3.75   | 5.35   | 5.48   | 3.93   | 4.35   | 2.18   |
| $R_{\text{CH}_4}$ (μmol/h<br>) | 0.0013 | 0.0018 | 0.0019 | 0.0013 | 0.0015 | 0.0007 |
| AQE (%)                        | 0.0447 | 0.0440 | 0.0386 | 0.0332 | 0.0233 | 0.0146 |



**Table S3.** The fitted lifetimes obtained from decay curves of WO<sub>3</sub> and WI10 in different atmospheres. WI10 represents the WO<sub>3</sub>/In<sub>2</sub>O<sub>3</sub> heterojunctions, where W and I represent WO<sub>3</sub> and In<sub>2</sub>O<sub>3</sub>, respectively; *I*0 is the molar ratios of In<sub>2</sub>O<sub>3</sub> in WO<sub>3</sub>/In<sub>2</sub>O<sub>3</sub> composites.

| Sample               | $\tau_1$ (ns) | $\tau_2$ (ns) | $\tau_3$ (ns) | $\tau_a$ (ns) |
|----------------------|---------------|---------------|---------------|---------------|
| WO <sub>3</sub> -Ar  | 0.96          | 3.44          | 9.35          | 4.15          |
| WI10-Ar              | 0.76          | 2.98          | 8.83          | 3.56          |
| WI10-CO <sub>2</sub> | 0.71          | 3.05          | 9.03          | 3.38          |

## References

1. K. Lejaeghere, V. Van Speybroeck, G. Van Oost, S. Cottenier, *Crit. Rev. Solid State Mater. Sci.*, 2014, **39**, 1-24.
2. X. Tao, P. Pan, T. B. Huang, L. Chen, H. D. Ji, J. J. Qi, F. B. Sun, W. Liu, *Chem. Eng. J.*, 2020, **395**, 125186.
3. Y. Peng, W. Z. Si, X. Li, J. M. Luo, J. H. Li, J. Crittenden, J. M. Hao, *Appl. Catal. B*, 2016, **181**, 692-698.
4. D. Z. Zhang, Y. H. Cao, Z. M. Yang, J. F. Wu, *ACS Appl. Mater. Interfaces*, 2020, **12**, 11979-11989.
5. J. Y. Ye, C. J. Liu, D. H. Mei, Q. F. Ge, *ACS Catal.*, 2013, **3**, 1296-1306.
6. L. F. Song, K. P. Dou, R. R. Wang, P. Leng, L. Q. Luo, Y. Xi, C. C. Kaun, N. Han, F. Y. Wang, Y. F. Chen, *ACS Appl. Mater. Interfaces*, 2020, **12**, 1270-1279.
7. B. C. Zhu, B. Cheng, L. Y. Zhang, J. G. Yu, *Carbon Energy*, 2019, **1**, 32-56.
8. I. B. Obot, D. D. Macdonald, Z. M. Gasem, *Corros. Sci.*, 2015, **99**, 1-30.
